# Supplementary material
Source: HighWire-hosted journal article supplement (https://bmjopen.bmj.com/content/14/12/e084803)
Supplement: inline-supplementary-material-1 [file inline-supplementary-material-1.pdf]

## Supplement 1

### **Ecuadorian health workers' qualitative perspectives on attributes of asthma care coordination**

#### **In-depth Interview Guide: Care Coordination**

1. To begin with, I would like to get your opinion on the functioning of the health system in this health district.
2. How would you define coordination between primary care and specialised care?
3. What is your opinion on the coordination of care between services?
4. What elements are facilitating care coordination, why, and how does it influence the quality of care?
5. What elements are hindering care coordination, why, and how does it affect the quality of care?
6. What is the role of the first level of care in the care of a patient with asthma? What is your opinion on how they are performing this role? What could be improved?
7. How do professionals at different levels of care communicate to treat patients with asthma? What do you think? Why? What would you improve?
8. How is clinical information about the asthma patient transmitted between first level and specialised care? What clinical information about the patient is shared? What is your opinion about this information?
9. What tools do the levels of care use to communicate the clinical conditions of asthma patients when they go from the first level to specialised care and vice versa? What do you think? How do these tools contribute to care coordination?
10. What makes the use of these instruments easier, what makes them more difficult and why?
11. What suggestions do you have for improving care coordination between services?
